# Supplementary material for: Post transcriptional control restrains the IL17–GCSF axis and limits neutrophil-driven breast cancer metastasis
Source: Research Square preprint supplement (doi:10.21203/rs.3.rs-7545087/v1), 2025-10-29
Supplement: Supplementary file 1 [file 7d1298d3226072027e87d19d.pdf]

A.

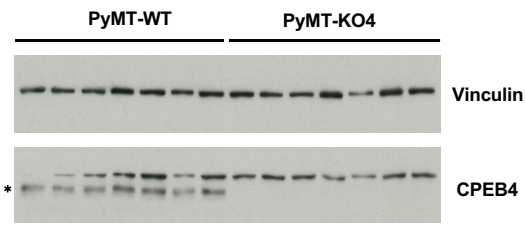

B.

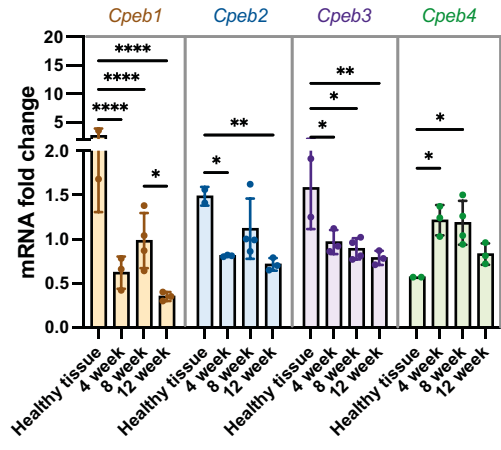

C.

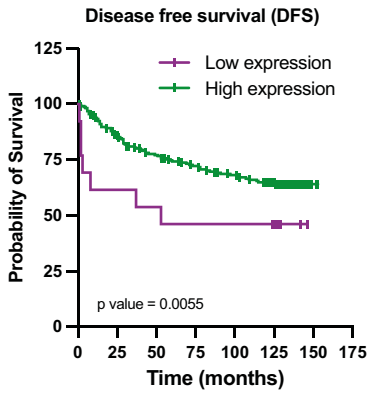

D.

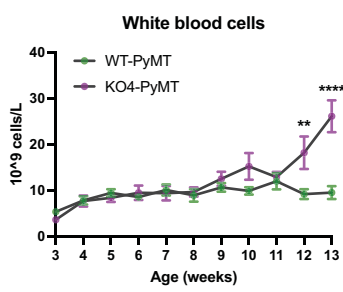

E.

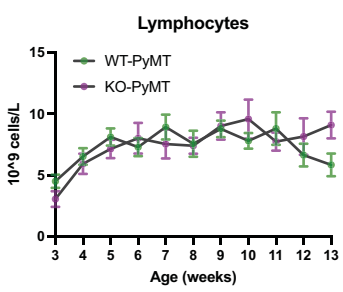

F.

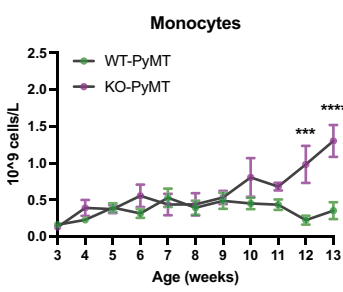

G.

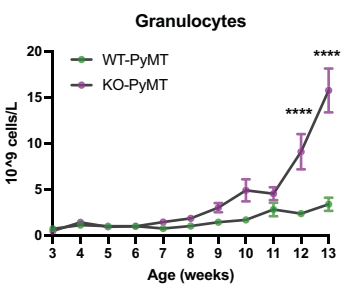

H.

Blood

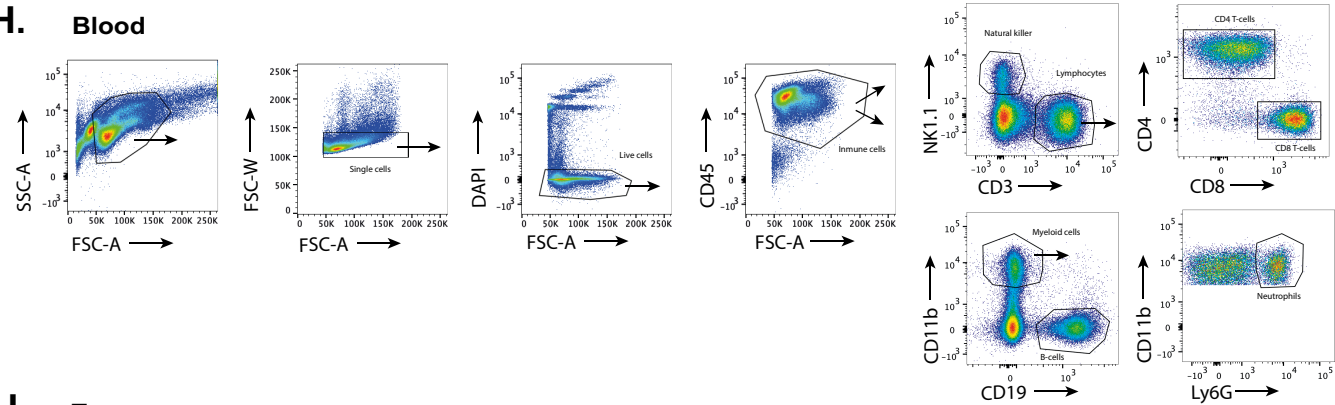

I.

Tumor

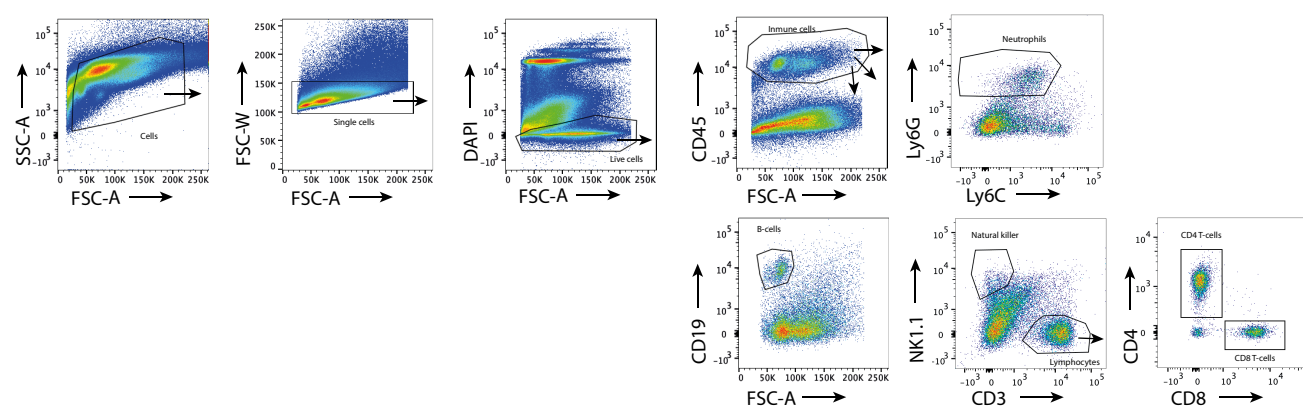

## J. Lungs

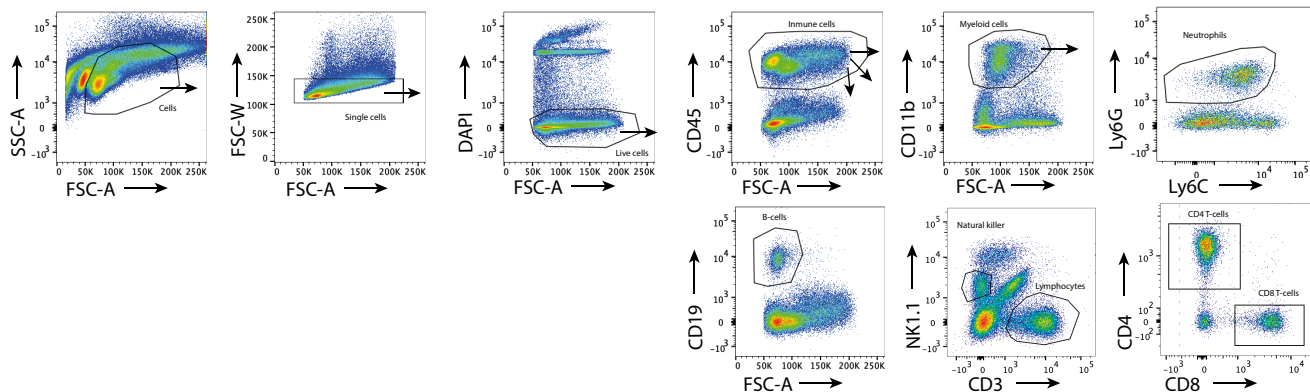

## K.

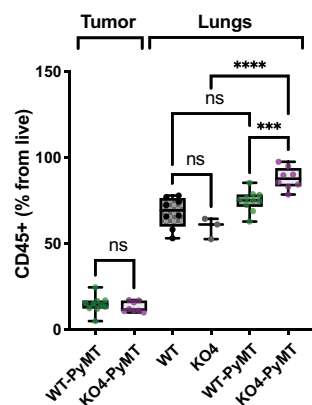

## L.

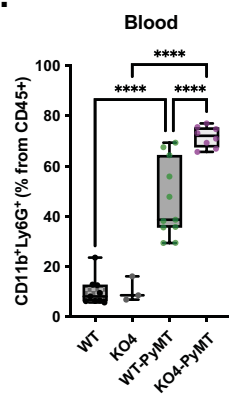

## M.

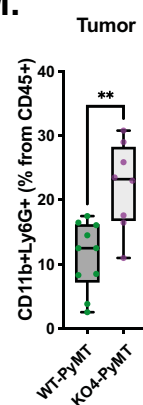

## N.

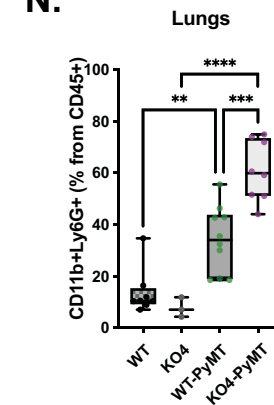

## O.

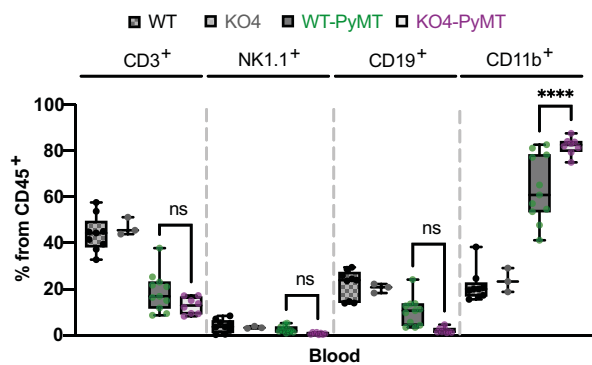

## P.

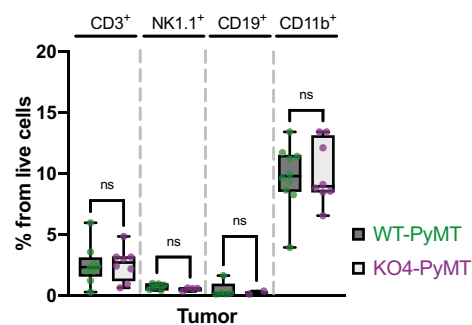

## Q.

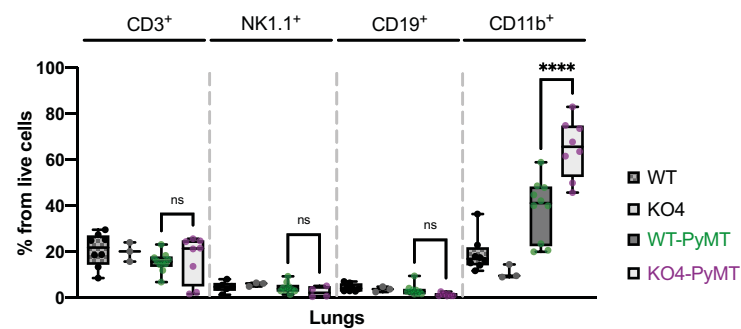



## Extended Data Figure 1.

**A.** Western Blot of whole tumor lysates from WT-PyMT and KO4-PyMT breast tumors. CPEB4 protein levels are shown (\*marks specific band). **B.** RT-qPCR showing *Cpebl-4* mRNA levels in healthy tissue and in different stages of tumor progression (4, 8 and 12 week) in MMTV-PyMT mice model. **C.** Disease free survival (DSF) according to *Cpeb4* mRNA expression in the BCIP (Breast Cancer Integrative Platform) GSEA922\_GPL97 dataset. **D, E, F, G.** Blood analysis of WT-PyMT and KO4-PyMT mice during tumor progression, from 3 to 13 weeks of age. White blood cells (B), lymphocytes (C), monocytes (D) and granulocytes (E) are shown. **H, I, J.** Gating strategy of flow cytometry analysis of immune cells present in blood (H), tumors (I) and lungs (J) from WT-PyMT and KO4-PyMT tumors. **K-Q.** Blood (L, O), tumors (K, M, P), and lungs (K, N, Q) of WT, KO4, WT-PyMT and KO4-PyMT mice analyzed by flow cytometry. (K) Immune cells infiltration in tumors and lungs is shown as % of CD45<sup>+</sup> cells from total number of live cells in the tissue. (L, M, N) Neutrophil abundance is shown as % of CD11b<sup>+</sup>Ly6G<sup>+</sup> cells from total immune population (CD45<sup>+</sup>). (O, P, Q) Relative abundance of lymphocytes (CD3<sup>+</sup>), natural killer cells (NK1.1<sup>+</sup>), B-cells (CD19<sup>+</sup>) and myeloid cells (CD11b<sup>+</sup>) shown as % of total immune cells (CD45<sup>+</sup>) (O) or % of live cells (P, Q).

**Data information:** data are represented as mean  $\pm$  s.d (B) or  $\pm$  SEM (D-G). In (K-P) data are shown as a box (the median is middle band) with whiskers (min and max), where points represent individual mice. Statistical analysis was performed by two-way ANOVA (with Fisher's LSD test (B) or Šidák's correction (C-G)), one-way ANOVA (K, L, N-Q) or T-test (M). *P*-values \* $<0.05$ , \*\* $<0.01$ , \*\*\* $<0.001$ , \*\*\*\* $<0.0001$  are indicated in the graphs; ns = not significant.

**A.** *In vivo* luciferase signal (NO Day0 correction)

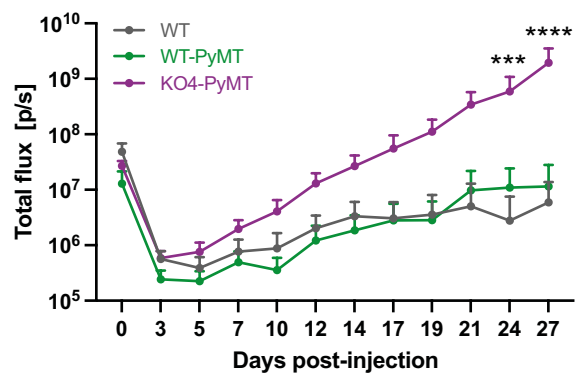

**B.**

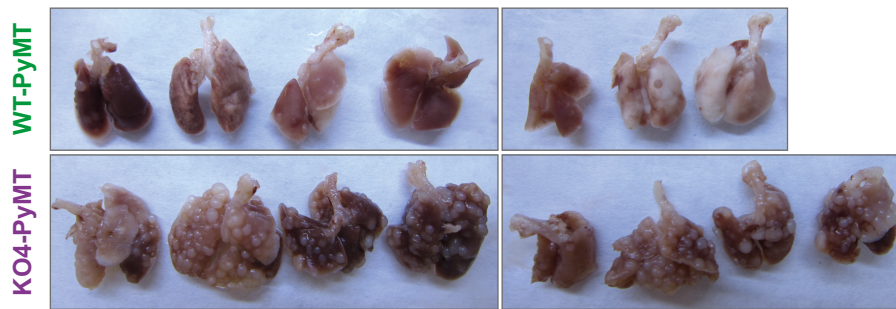

**C.**

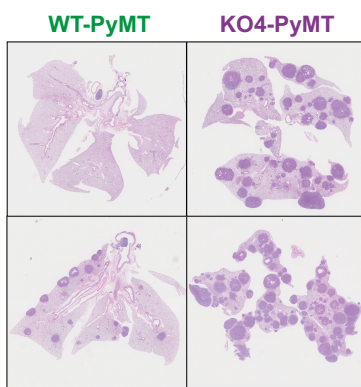

29 **Extended Data Figure 2.**

30 **A.** *In vivo* quantification of bioluminescence signal (without day0 correction) of lung metastasis from  
31 WT, WT-PyMT and KO4-PyMT mice after tail-vein injection with peWT-PyMT-Luc cells. **B, C.**  
32 Images of lungs with macrometastasis (B) and representative H&E-stained lung sections from WT-  
33 PyMT and KO4-PyMT mice at day 27 post pePyMT-LUC cells injection.

34 **Data information:** data are represented as mean s.d. (A). Statistical analysis was performed by two-  
35 way ANOVA with Tukey correction (A). *P*-values \*\*\*<0.001, \*\*\*\*<0.0001 are indicated in the graphs.

36

37

38

39

40

41

42

43

44

45

46

47

48

49

50

51

52

53

54

55

56

57

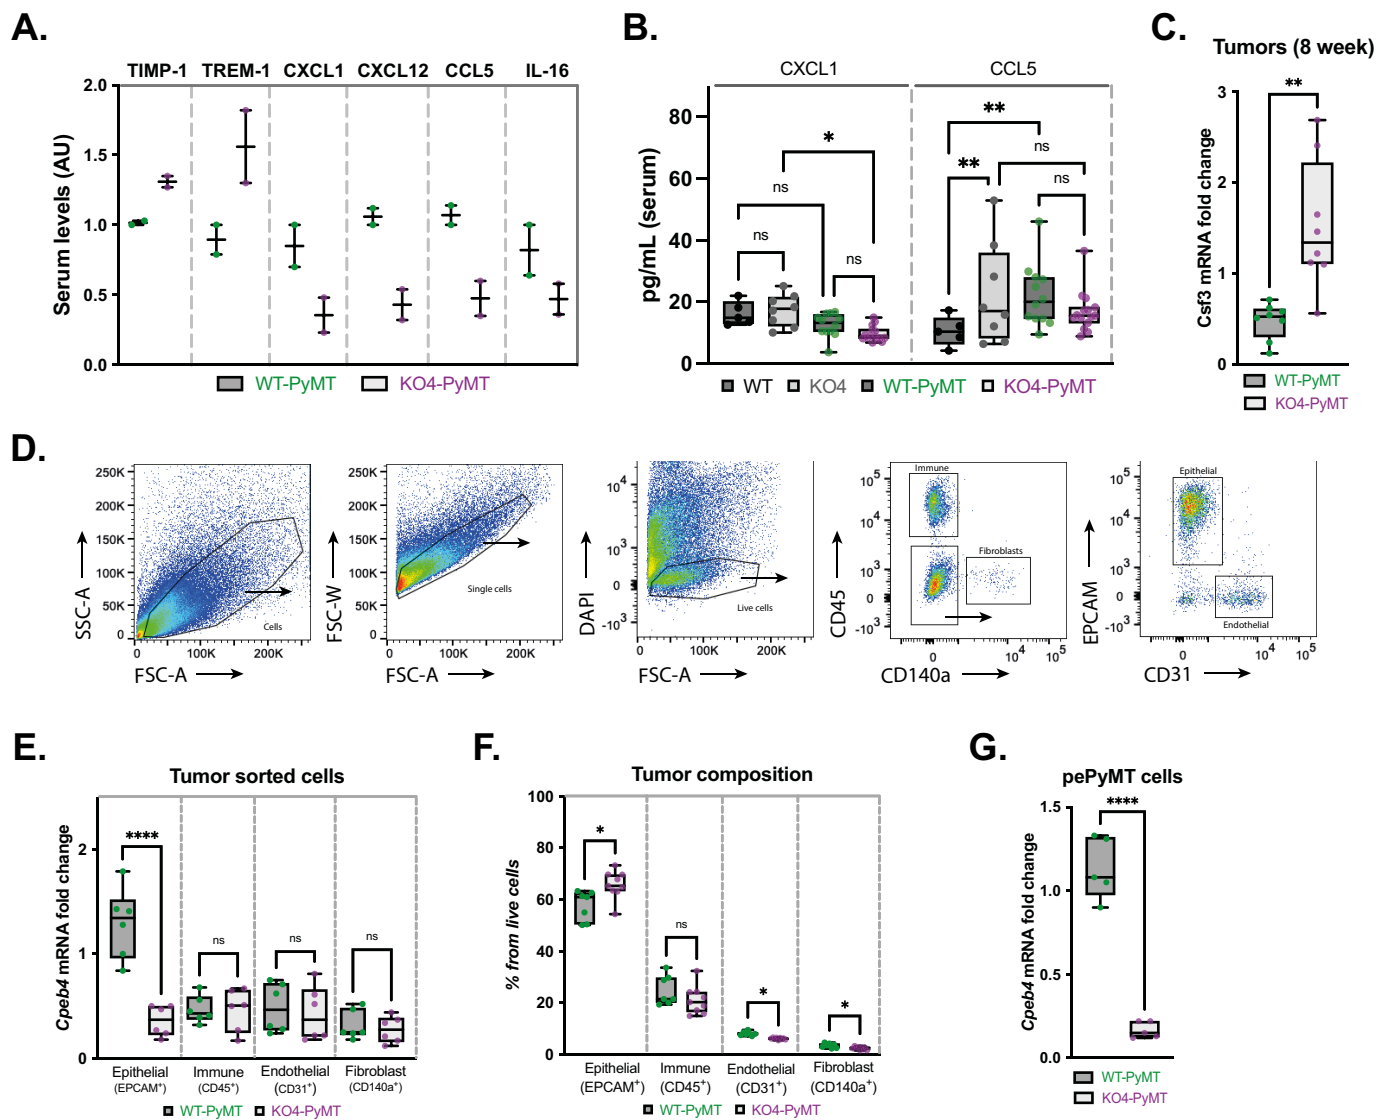

58 **Extended Data Figure 3.**

59 **A.** Quantification of cytokine arrays incubated with serum from WT-PyMT and KO4-PyMT mice (12  
60 weeks). Differently expressed cytokines are shown. **B.** Quantification of CXCL1 and CCL5 levels in  
61 serum from WT, KO4, WT-PyMT and KO4-PyMT mice using Luminex MAGPIX system. **C.** RT-qPCR  
62 of whole tumor mRNA from WT-PyMT and KO4-PyMT mice at early stage of tumor progression (8  
63 weeks). mRNA levels of *Csf3* are shown. **D.** Gating strategy of flow cytometry sorting of epithelial cells  
64 (EPCAM<sup>+</sup>), immune cells (CD45<sup>+</sup>), endothelial cells (CD31<sup>+</sup>) and fibroblasts (CD140a<sup>+</sup>) from WT-  
65 PyMT and KO4-PyMT tumors. **E.** RT-qPCR of *Cpeb4* mRNA levels in the different cell types present  
66 in the tumors (epithelial, immune, endothelial and fibroblasts), isolated by FACS-sorting after WT-  
67 PyMT and KO4-PyMT tumor disaggregation. **F.** Relative abundance of epithelial cells (EPCAM<sup>+</sup>),  
68 immune cells (CD45<sup>+</sup>), endothelial cells (CD31<sup>+</sup>) and fibroblasts (CD140a<sup>+</sup>) in WT-PyMT and KO4-  
69 PyMT tumors shown as % of total live cells. **G.** RT-qPCR showing *Cpeb4* mRNA levels in pePyMT  
70 from WT-PyMT and KO4-PyMT tumors after isolation and *ex vitro* culture.

71 **Data information:** data are shown as a box (the median is middle band) with whiskers (min and max),  
72 where points represent individual mice. Statistical analysis was performed by two-way ANOVA (B), T-  
73 test (C, G) or one-way ANOVA (E, F). *P*-values \* $<0.05$ , \*\* $<0.01$ , \*\*\* $<0.001$ , \*\*\*\* $<0.0001$  are  
74 indicated in the graphs; ns = not significant.

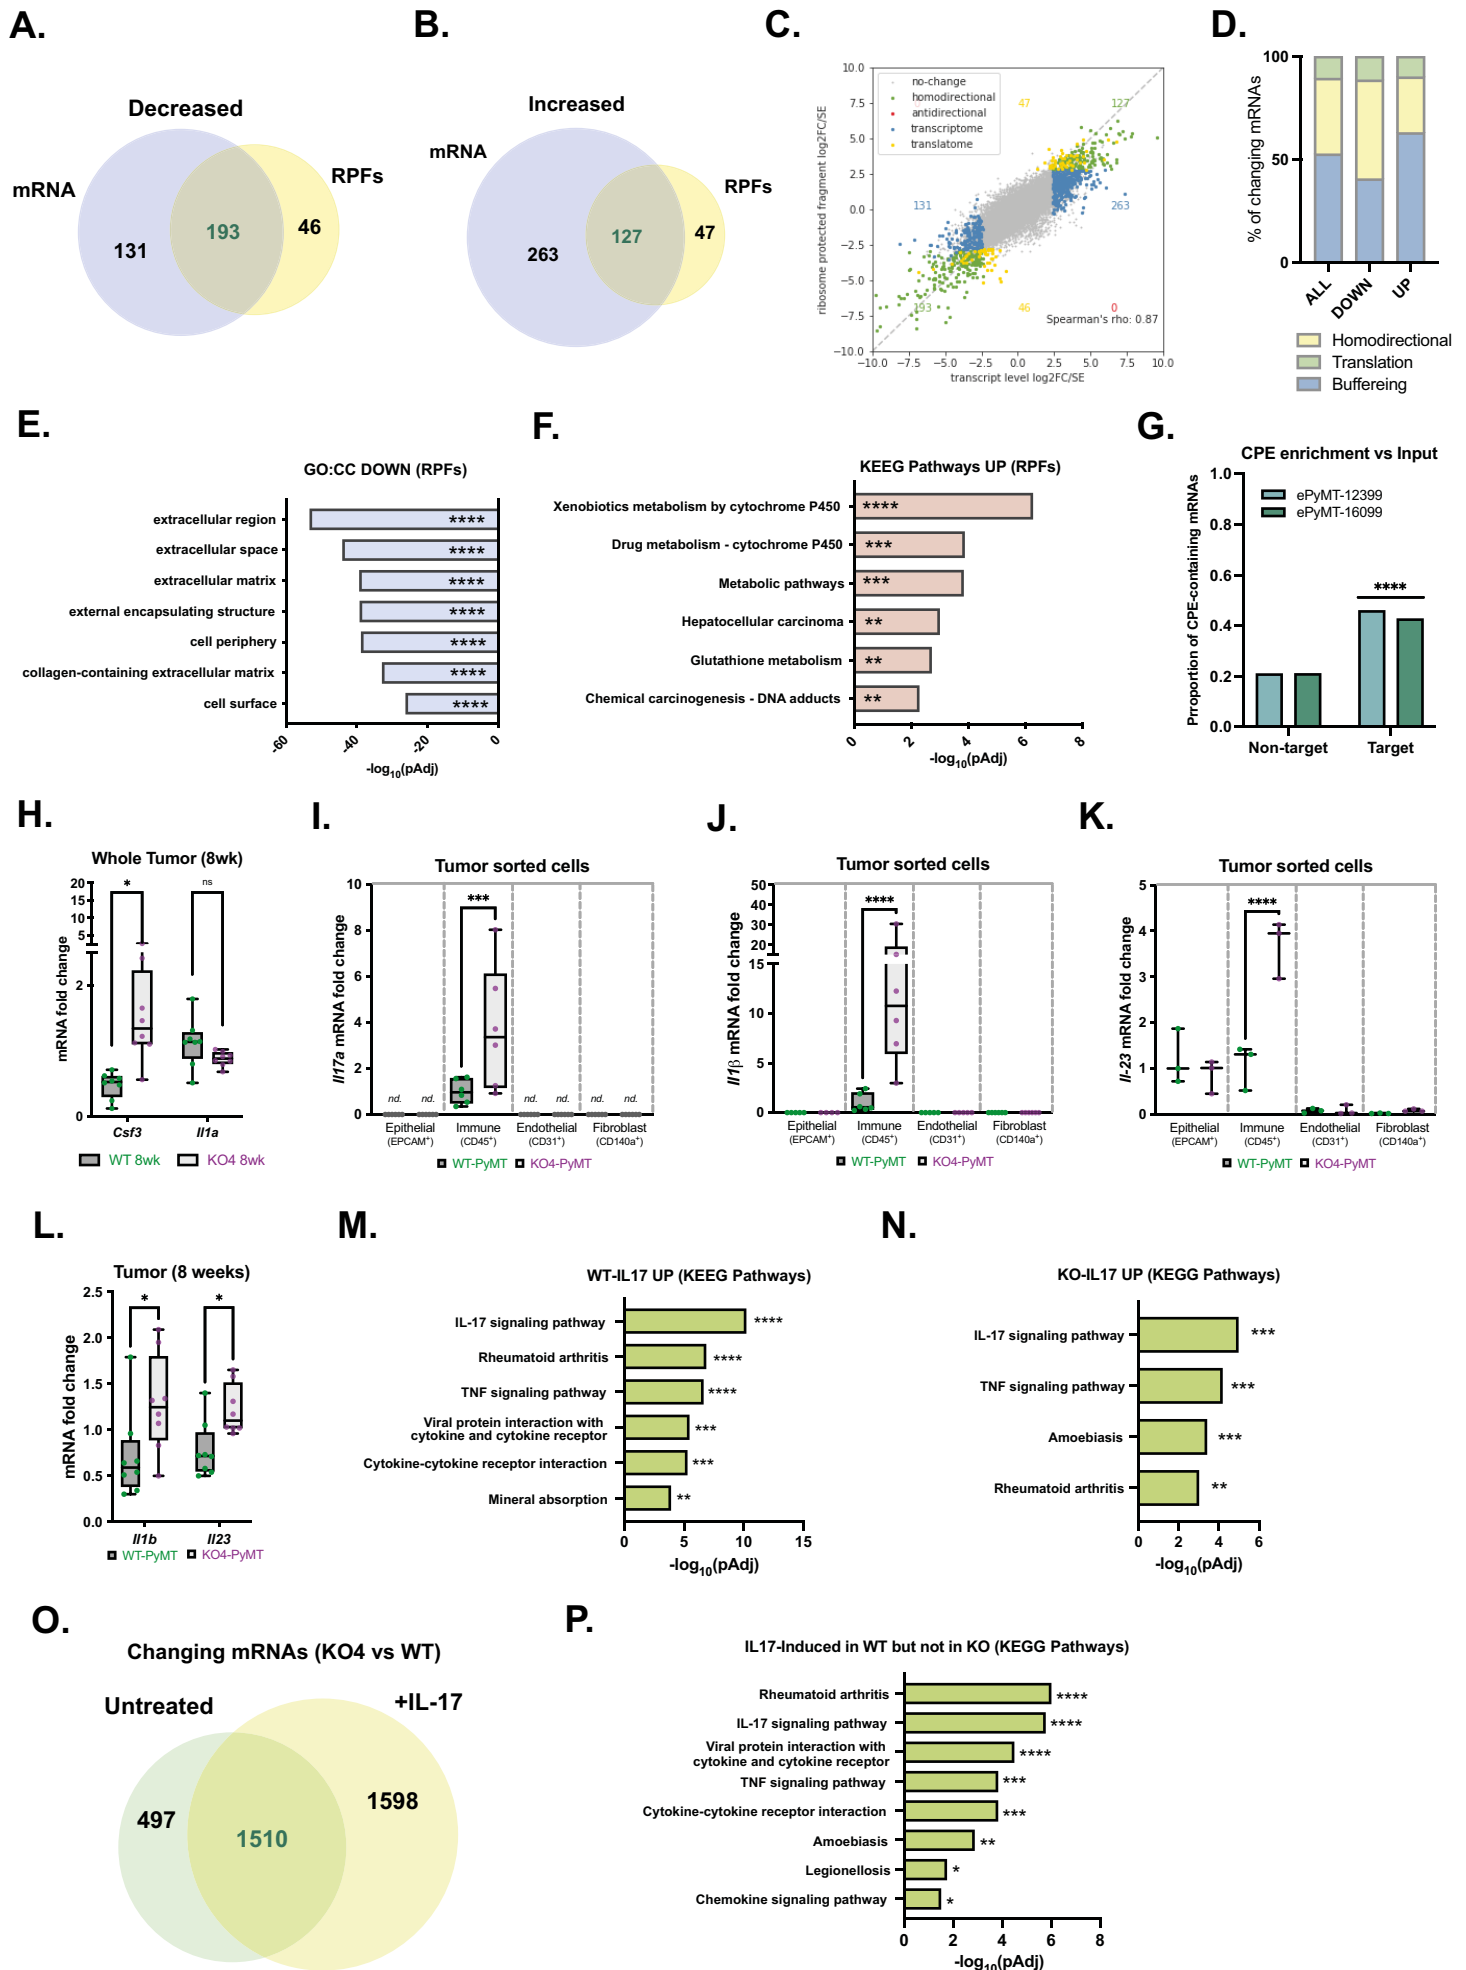



75 **Extended Data Figure 4.**

76 **A, B.** Venn diagram showing overlay of mRNAs decreased (A) or increased (B) at mRNA and ribosome  
77 protected fragment (RPF) level from a ribosome profiling analysis in WT-pePyMT and KO4-pePyMT  
78 cells. **C.** Scatter plot showing the classification of gene regulatory modes based on ribosome profiling  
79 data, as described in <sup>50</sup>. Genes are categorized into homodirectional regulation (green), where mRNA  
80 abundance and translation are coupled; translational buffering (blue), where changes in mRNA levels  
81 are offset by inverse changes in translation efficiency; and translational regulation (yellow), where  
82 mRNA levels remain unchanged, but translation efficiency is modulated. **D.** Bar plot showing the  
83 proportion of mRNAs regulated by each regulatory mode specified in (C). **E, F.** Pathway enrichment  
84 analysis from genes with decreased (E) or increased (F) RPFs in KO4-PyMT vs WT-PyMT ePyMT cells  
85 in the Ribosome Profiling. Top pathways enriched from Gene Ontology:CC (location) (E) and KEGG  
86 pathway (F) collection database are shown. **G.** Comparison of percentage of genes containing CPE  
87 element in their 3'UTR in the whole mouse transcriptome versus RIP targets in 12399 and 16099  
88 immortalized ePyMT cells. **H.** RT-qPCR of whole early stage (8 weeks) tumor samples. mRNA levels  
89 of *Csf3* and *Il1a* are shown. **I-K.** RT-qPCR of *Il17a* (I), *Il1β* (J) and *Il23* (K) mRNA levels in the  
90 different cell types present in the tumors (epithelial, immune, endothelial and fibroblasts). **L.** RT-qPCR  
91 of whole early stage (8 weeks) tumor samples. mRNA levels of *Il1b* and *Il23* are shown. **M, N.** RNA-  
92 seq pathway enrichment analysis from genes upregulated after IL-17A treatment in WT-pePyMT cells  
93 (M) and in KO4-pePyMT cells (N). Top pathways enriched from the KEGG pathway collection database  
94 are shown. **O.** Venn diagram showing RNA-seq overlay between significantly changing RNAs in KO4-  
95 pePyMT cells compared to WT-pePyMT in basal conditions and after IL-17A treatment. **P.** RNA-seq  
96 pathway enrichment analysis from genes significantly upregulated in WT but not in CPEB4 KO  
97 pePyMT cells upon IL-17A treatment. Top pathways enriched from the KEGG pathway collection  
98 database are shown.

99 **Data information:** data are shown as a box (the median is middle band) with whiskers (min and max),  
100 where points represent individual mice/sample (H-L). Statistical analysis was performed by multiple T-  
101 test (H, L) or one-way ANOVA (I-K). *P*-values/pAdj \* $<0.05$ , \*\* $<0.01$ , \*\*\* $<0.001$ , \*\*\*\* $<0.0001$  are  
102 indicated in the graphs; ns = not significant.

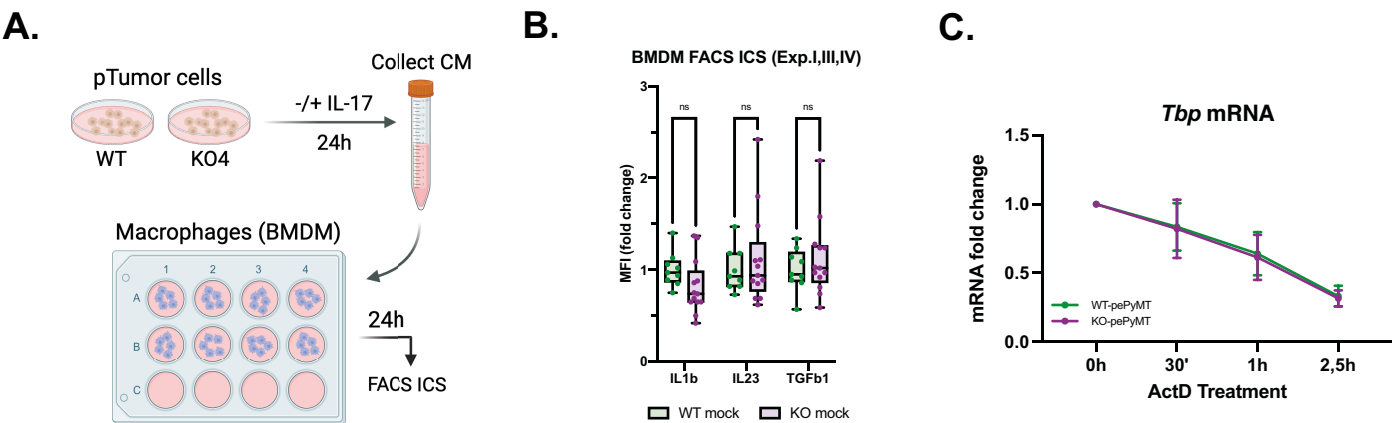

103 **Extended Data Figure 5.**

104 **A.** Schematic representation of the experimental design for macrophage activation with tumor cell CM  
105 (created in BioRender. Mendez, R. (2025) <https://BioRender.com/e53m553>). **B.** FACS intracellular  
106 staining (ICS) of BMDM after activation with CM from WT and CPEB4 pePyMT cells. **C.** mRNA  
107 stability of *Tbp* mRNAs after actinomycin D (ActD) treatment in WT and Cpeb4 KO pePyMT cells.  
108 Gene expression analyzed by RT-qPCR and normalized to *Rplp0*.

109 **Data information:** data are shown as a box (the median is middle band) with whiskers (min and max)  
110 in (B) and as mean  $\pm$ s.d in (C). Statistical analysis was performed by two-way ANOVA; ns = not  
111 significant.
